# Supplementary material for: Interactions, Structure and Properties of PLA/lignin/PBAT Hybrid Blends
Source: MDPI journal article supplement (doi:10.3390/polym15153237), 2023-07-29
Supplement: s1 [file s1]

**Supplementary Information on**

**INTERACTIONS, STRUCTURE AND PROPERTIES IN PLA/LIGNIN/PBAT  
HYBRID BLENDS**

Emese Pregi <sup>1,2,\*</sup>, Imre Romsics <sup>1,2</sup>, Róbert Várdai <sup>1,2</sup> and Béla Pukánszky <sup>1,2</sup>

<sup>1</sup> Laboratory of Plastics and Rubber Technology, Department of Physical Chemistry and Materials Science, Faculty of Chemical Technology and Biotechnology, Budapest University of Technology and Economics, Műegyetem rkp. 3., H-1111 Budapest, Hungary

<sup>2</sup> Institute of Materials and Environmental Chemistry, Research Centre for Natural Sciences, Magyar Tudósok Körútja 2., H-1117 Budapest, Hungary

\* Corresponding author: Tel: 36-1-463-4337, E-mail: [pregi.emese@mail.bme.hu](mailto:pregi.emese@mail.bme.hu)

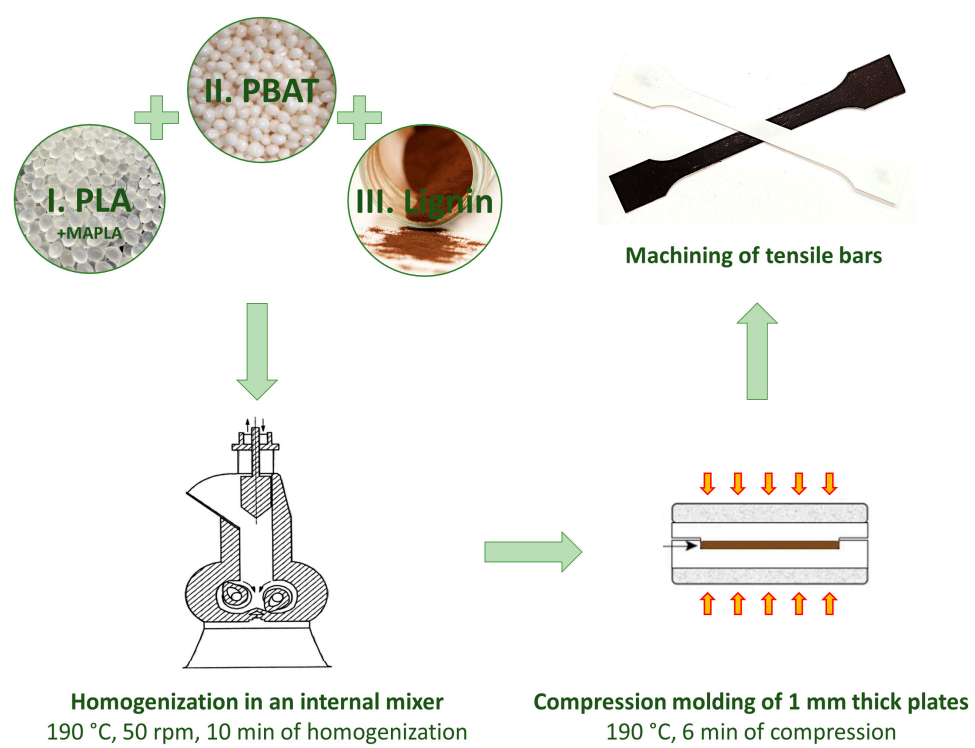

**Figure S1.** The preparation process of the samples

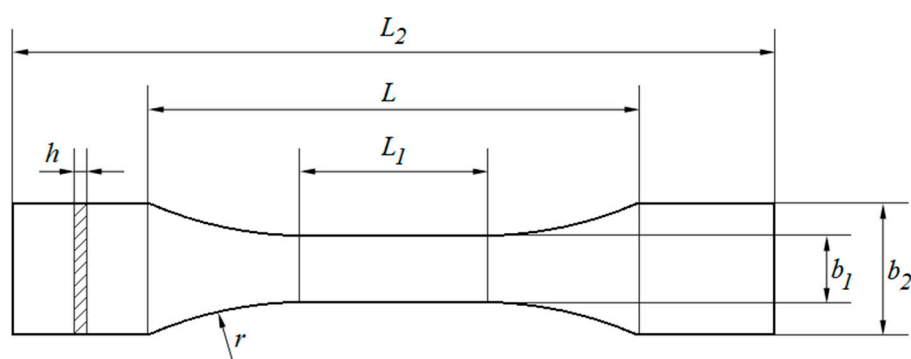

**Figure S2.** Shape and dimensions of tensile test specimens

**Table S1** Dimensions of tensile test specimens

|       |                                         |        |
|-------|-----------------------------------------|--------|
| $b_1$ | width at narrow portion                 | 10 mm  |
| $b_2$ | width at ends                           | 20 mm  |
| $h$   | thickness                               | 1 mm   |
| $L_1$ | length of narrow parallel-sided portion | 35 mm  |
| $L$   | initial distance between grips          | 75 mm  |
| $L_2$ | overall length                          | 115 mm |
| $r$   | radius                                  | 50 mm  |

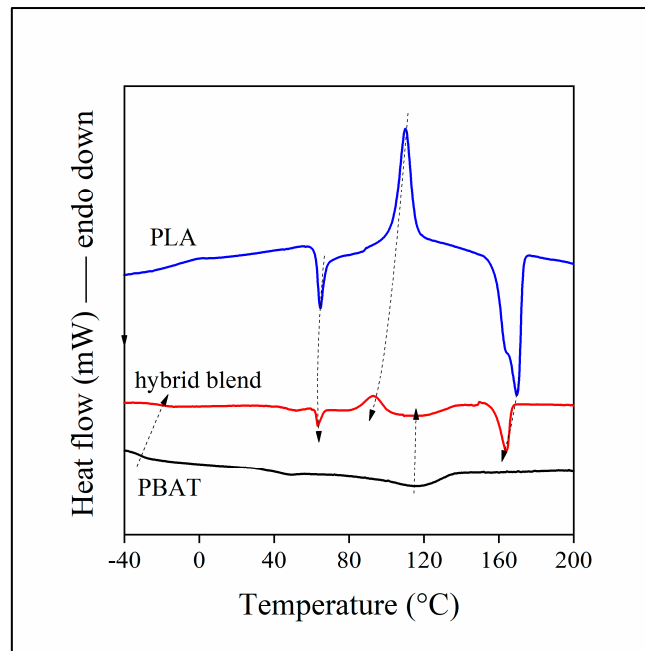

**Figure S3.** The result of a DSC measurement on a neat PLA, neat PBAT and PLA/lignin/PBAT blend containing 20 vol% lignin, 60 vol % PBAT and the functionalized PLA. First heating run.

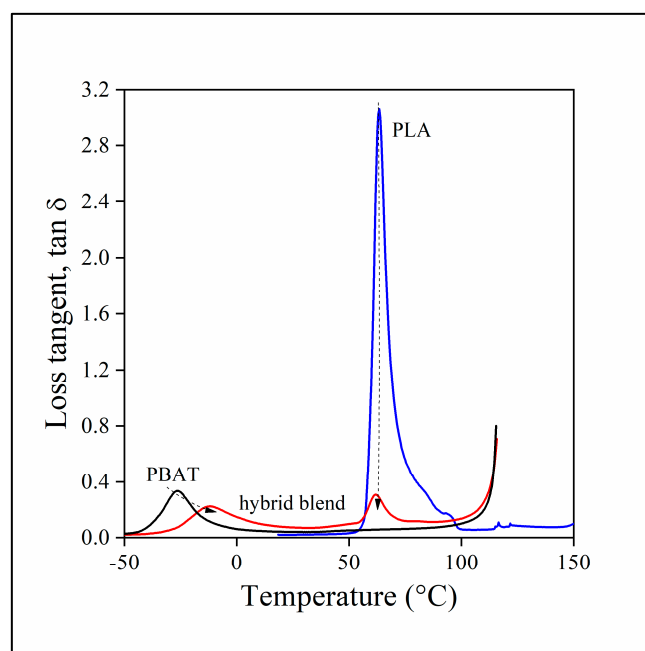

**Figure S4.** Dynamic mechanical spectra recorded on the neat PLA, neat PBAT and PLA/lignin/PBAT blend containing 20 vol% lignin, 60 vol% PBAT and MAPLA; temperature dependence of  $\tan \delta$ .

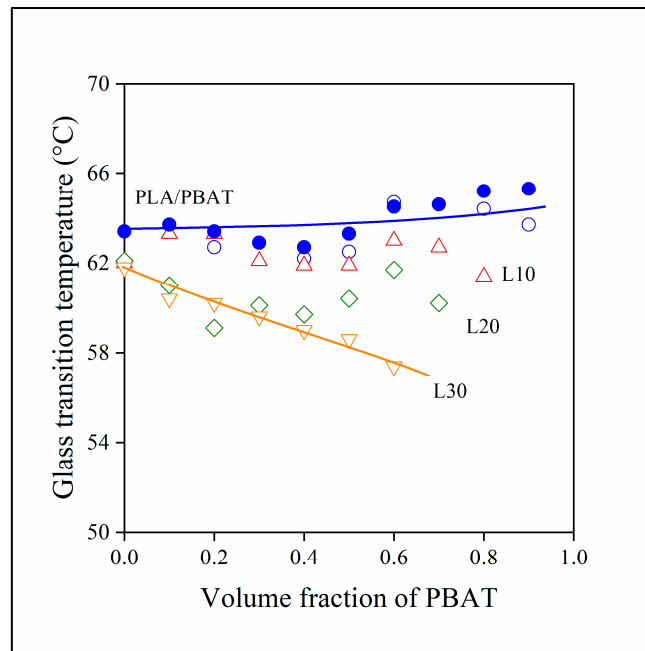

**Figure S5.** Composition dependence of the glass transition temperature of PLA in the two- and three-component blends studied. Symbols: (●) PLA/PBAT; (■) PBAT/lignin; lignin content in three-component blends: (△) 10, (◇) 20, (▽) 30 vol%. Empty symbols with and full symbols without MAPLA.

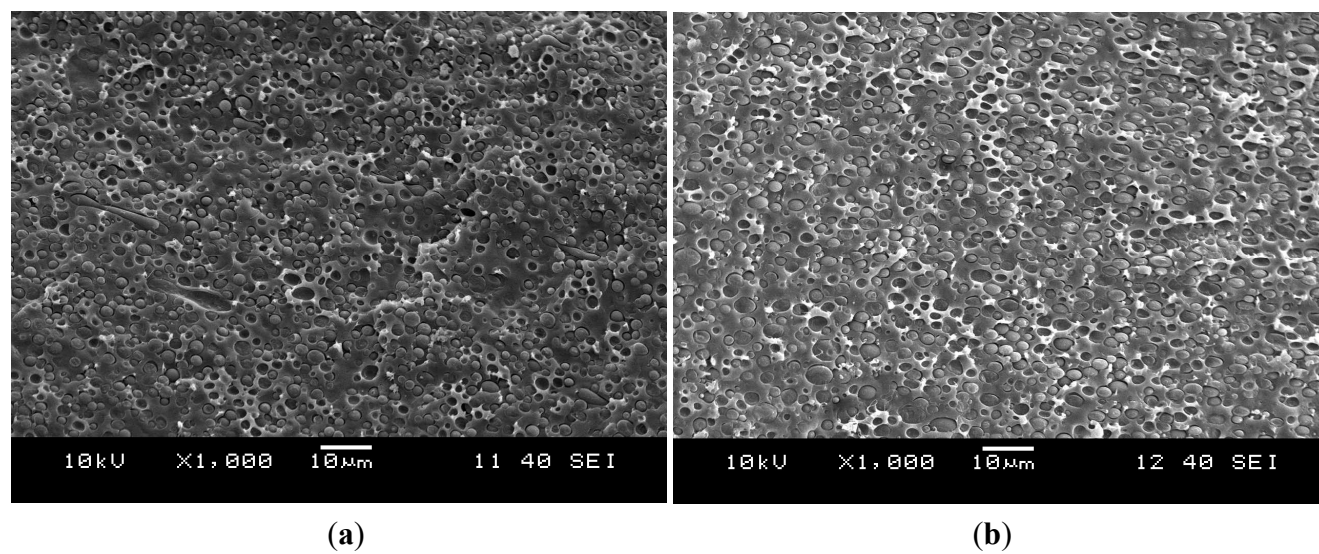

**Figure S6.** Micrographs recorded on the structure of two-component PLA/PBAT blends containing 30 vol% of PBAT: (a) with MAPLA; (b) without MAPLA.

**Table S2.** Mechanical properties of two-component blends.

| Sample     | Modulus (GPa) |           | Tensile strength (MPa) |           | Elongation-at-break |           |
|------------|---------------|-----------|------------------------|-----------|---------------------|-----------|
|            | average       | std. dev. | average                | std. dev. | average             | std. dev. |
| PLA        | 3.32          | 0.091     | 55.89                  | 1.246     | 2.98                | 0.253     |
| PLA-L10    | 3.48          | 0.071     | 53.04                  | 0.856     | 1.87                | 0.028     |
| PLA-L20    | 3.50          | 0.135     | 32.04                  | 2.258     | 0.61                | 0.090     |
| PLA-L30    | 3.60          | 0.050     | 19.84                  | 2.425     | 0.31                | 0.007     |
| PLA-L40    | 3.74          | 0.014     | 9.94                   | 0.919     | 2.98                | 0.253     |
| PLA-PBAT10 | 2.91          | 0.032     | 25.42                  | 8.153     | 22.4                | 6.49      |
| PLA-PBAT20 | 2.51          | 0.056     | 30.42                  | 2.201     | 79.0                | 19.07     |
| PLA-PBAT30 | 1.93          | 0.091     | 25.33                  | 1.067     | 128.4               | 59.85     |
| PLA-PBAT40 | 1.37          | 0.023     | 18.24                  | 1.338     | 100.2               | 12.13     |
| PLA-PBAT50 | 0.78          | 0.064     | 16.54                  | 0.661     | 28.5                | 11.84     |
| PLA-PBAT60 | 0.35          | 0.019     | 12.15                  | 0.761     | 50.7                | 11.87     |
| PLA-PBAT70 | 0.21          | 0.006     | 12.32                  | 0.220     | 180.0               | 18.85     |
| PLA-PBAT80 | 0.16          | 0.004     | 15.83                  | 0.724     | 430.3               | 33.05     |
| PLA-PBAT90 | 0.11          | 0.006     | 17.03                  | 0.537     | 781.9               | 30.15     |
| PBAT       | 0.10          | 0.015     | 20.32                  | 0.000     | 900.0               | 0.00      |
| PBAT-L10   | 0.12          | 0.006     | 14.73                  | 0.113     | 708.2               | 45.03     |
| PBAT-L20   | 0.13          | 0.010     | 12.58                  | 0.731     | 306.2               | 32.51     |
| PBAT-L30   | 0.15          | 0.015     | 12.57                  | 0.291     | 272.3               | 17.43     |
| PBAT-L40   | 0.22          | 0.012     | 9.68                   | 0.110     | 98.3                | 6.10      |
| PBAT-L50   | 0.34          | 0.014     | 9.51                   | 0.170     | 34.9                | 5.69      |
| PBAT-L60   | 0.74          | 0.045     | 10.65                  | 0.272     | 12.6                | 2.33      |

**Table S3.** Mechanical properties of two-component blends containing MAPLA.

| Sample        | Modulus (GPa) |           | Tensile strength (MPa) |           | Elongation-at-break |           |
|---------------|---------------|-----------|------------------------|-----------|---------------------|-----------|
|               | average       | std. dev. | average                | std. dev. | average             | std. dev. |
| PLA           | 3.32          | 0.091     | 55.89                  | 1.246     | 2.98                | 0.253     |
| PLA-M-L10     | 3.52          | 0.095     | 44.53                  | 4.455     | 1.43                | 0.148     |
| PLA-M-L20     | 3.53          | 0.078     | 30.92                  | 2.978     | 0.98                | 0.071     |
| PLA-M-L30     | 3.52          | 0.344     | 11.43                  | 0.419     | 0.35                | 0.036     |
| PLA-M-L40     | 3.11          | 0.318     | 3.76                   | 0.573     | 0.17                | 0.007     |
| PLA- M-PBAT10 | 2.82          | 0.091     | 29.33                  | 0.991     | 4.44                | 0.949     |
| PLA- M-PBAT20 | 2.37          | 0.034     | 27.07                  | 0.924     | 6.47                | 0.681     |
| PLA- M-PBAT30 | 1.92          | 0.056     | 24.13                  | 0.798     | 6.32                | 0.769     |
| PLA- M-PBAT40 | 1.55          | 0.061     | 25.59                  | 1.651     | 6.29                | 0.397     |
| PLA- M-PBAT50 | 0.92          | 0.051     | 16.31                  | 1.106     | 13.5                | 2.41      |
| PLA- M-PBAT60 | 0.34          | 0.026     | 12.46                  | 0.234     | 38.7                | 2.56      |
| PLA- M-PBAT70 | 0.23          | 0.006     | 13.39                  | 0.035     | 208.5               | 25.68     |
| PLA- M-PBAT80 | 0.17          | 0.010     | 17.02                  | 0.493     | 472.1               | 7.07      |
| PLA- M-PBAT90 | 0.12          | 0.001     | 17.26                  | 2.376     | 856.5               | 5.12      |
| PBAT          | 0.10          | 0.015     | 20.32                  | 0.000     | 900.0               | 0.00      |

**Table S4.** Mechanical properties of three-component hybrid blends containing MAPLA.

| Sample           | Modulus (GPa) |           | Tensile strength |           | Elongation-at-break |           |
|------------------|---------------|-----------|------------------|-----------|---------------------|-----------|
|                  | average       | std. dev. | average          | std. dev. | average             | std. dev. |
| PLA-M-L10        | 3.52          | 0.095     | 44.53            | 4.455     | 1.43                | 0.148     |
| PLA-M-L10-PBAT10 | 2.81          | 0.033     | 36.21            | 0.680     | 4.44                | 0.949     |
| PLA-M-L10-PBAT20 | 2.24          | 0.028     | 27.35            | 1.905     | 6.47                | 0.681     |
| PLA-M-L10-PBAT30 | 1.79          | 0.008     | 25.66            | 0.711     | 6.32                | 0.769     |
| PLA-M-L10-PBAT40 | 1.28          | 0.015     | 20.49            | 0.528     | 6.29                | 0.397     |
| PLA-M-L10-PBAT50 | 0.58          | 0.015     | 11.30            | 0.304     | 13.5                | 2.41      |
| PLA-M-L10-PBAT60 | 0.28          | 0.008     | 10.00            | 0.218     | 38.7                | 2.56      |
| PLA-M-L10-PBAT70 | 0.19          | 0.010     | 9.90             | 0.272     | 208.5               | 25.68     |
| PLA-M-L10-PBAT80 | 0.14          | 0.017     | 13.02            | 0.636     | 472.1               | 7.07      |
| PLA-M-L20        | 3.53          | 0.078     | 30.92            | 2.978     | 0.98                | 0.071     |
| PLA-M-L20-PBAT10 | 2.49          | 0.061     | 25.75            | 0.729     | 1.34                | 0.073     |
| PLA-M-L20-PBAT20 | 1.81          | 0.054     | 18.16            | 0.847     | 1.57                | 0.058     |
| PLA-M-L20-PBAT30 | 1.35          | 0.022     | 12.82            | 0.606     | 1.86                | 0.137     |
| PLA-M-L20-PBAT40 | 0.79          | 0.076     | 8.04             | 0.395     | 5.81                | 1.160     |
| PLA-M-L20-PBAT50 | 0.32          | 0.011     | 9.12             | 0.163     | 17.9                | 3.07      |
| PLA-M-L20-PBAT60 | 0.25          | 0.006     | 9.22             | 0.173     | 49.3                | 6.74      |
| PLA-M-L20-PBAT70 | 0.17          | 0.012     | 10.44            | 0.025     | 281.2               | 20.84     |
| PLA-M-L30        | 3.52          | 0.344     | 11.43            | 0.419     | 0.35                | 0.036     |
| PLA-M-L30-PBAT10 | 2.64          | 0.038     | 21.99            | 1.079     | 1.00                | 0.061     |
| PLA-M-L30-PBAT20 | 1.67          | 0.036     | 14.47            | 0.661     | 1.63                | 0.119     |
| PLA-M-L30-PBAT30 | 1.11          | 0.035     | 7.50             | 0.169     | 2.07                | 0.252     |
| PLA-M-L30-PBAT40 | 0.51          | 0.010     | 9.72             | 0.148     | 8.95                | 0.824     |
| PLA-M-L30-PBAT50 | 0.32          | 0.015     | 8.52             | 0.312     | 27.7                | 3.45      |
| PLA-M-L30-PBAT60 | 0.22          | 0.008     | 8.81             | 0.367     | 97.8                | 18.68     |
